# Supplementary material for: Prediction of COVID-19 severity using laboratory findings on admission: informative values, thresholds, ML model performance
Source: PubMed Central journal article supplement — BMJ Open. 2021 Feb 26;11(2):e044500. doi: 10.1136/bmjopen-2020-044500 (PMC7918887; doi:10.1136/bmjopen-2020-044500), 2021-02-26
Supplement: bmjopen-2020-044500supp005.pdf [file bmjopen-2020-044500supp005.pdf]

# Appendix

## A. ML classification models and feature selection.

### The variables used to build up the model

- *physical examination on admission*: temperature, HR BPM, SBP, DBP, RR /min. SpO<sub>2</sub>, SpO<sub>2</sub> on RA vs. O<sub>2</sub> Therapy, GCS, SOFA score
- *symptoms on admission*: cough, sputum, sore throat, chest pain, SOB, fever, headache, confusion, having any gastrointestinal symptoms (e.g., nausea, vomiting, diarrhea), myalgia, malaise, loss of smell or taste.
- *laboratory findings on admission*: count of WBC, platelet, and lymphocyte; the concentration of hemoglobin, total bilirubin, D-Dimer, creatinine, sodium, C-reactive protein, troponin, ferritin, fibrinogen; the activity of ALT, AST, CK, LDH; APTT.

### Feature selection

To check if there are unique patterns within the data that can unambiguously identify if the patient is going to be transferred to the intensive care unit, we utilized ML algorithms.

To assess the importance of the features fed to the ML models as predictors of admitted to ICU patients, we employed four ensemble tree-based estimators such as AdaBoost, Gradient Boosting, Random Forest, and Extra Trees. These models were trained on the whole dataset and used to rank the features in ascending order concerning their predictive potential. Figure 1 and Table 1 display the averaged values of impurity-based attribute ranks, where the average for each feature is calculated as the mean of rank values for the four ML methods mentioned above.

Table 1: Ranking scores of the variables selected for predicting the disease severity

| Score   | Feature           | Score   | Feature                                          | Score   | Feature         | Score   | Feature          |
|---------|-------------------|---------|--------------------------------------------------|---------|-----------------|---------|------------------|
| 0.19429 | SOFA score        | 0.02520 | Temperature                                      | 0.01164 | Total bilirubin | 0.00466 | Sore Throat      |
| 0.10168 | Clinical severity | 0.01748 | SOB                                              | 0.01135 | SBP             | 0.00445 | Troponin         |
| 0.08745 | O2 therapy        | 0.01712 | ALT                                              | 0.00983 | Fever           | 0.00367 | Confusion        |
| 0.08061 | RR/min            | 0.01623 | APTT                                             | 0.00969 | GCS             | 0.00309 | GI symptoms      |
| 0.04127 | LDH               | 0.01595 | Hemoglobin                                       | 0.00896 | Ethnicity       | 0.00287 | Cough            |
| 0.03829 | Lymphocytes       | 0.01545 | SpO <sub>2</sub> on RA vs O <sub>2</sub> Therapy | 0.00732 | HR BPM          | 0.00188 | Malaise          |
| 0.03223 | SpO <sub>2</sub>  | 0.01505 | Na                                               | 0.00637 | Myalgia         | 0.00186 | Chest pain       |
| 0.03212 | D-Dimer           | 0.01383 | AST                                              | 0.00633 | Sputum          | 0.00141 | Smell/taste loss |
| 0.03125 | CRP               | 0.01382 | CK                                               | 0.00524 | DBP             | 0.00000 | Creatinine       |
| 0.03067 | Platelet          | 0.01360 | WBC                                              | 0.00513 | Headache        | 0.00000 | Ferritin         |
|         |                   |         |                                                  |         |                 | 0.00000 | Fibrinogen       |

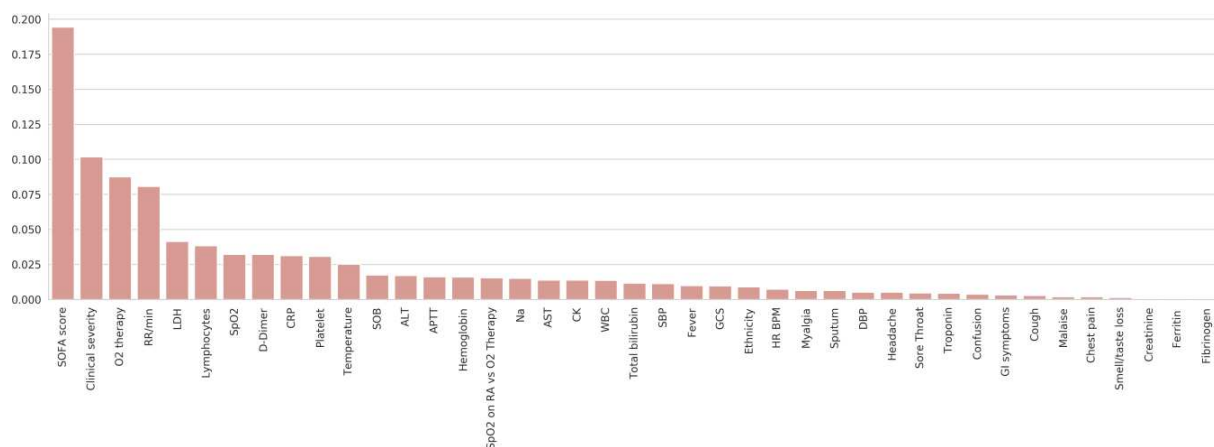

Figure 1: Feature selection for predicting whether a patient is going to be transferred to ICU
