# Supplementary material for: Prediction of COVID-19 severity using laboratory findings on admission: informative values, thresholds, ML model performance
Source: PubMed Central journal article supplement — BMJ Open. 2021 Feb 26;11(2):e044500. doi: 10.1136/bmjopen-2020-044500 (PMC7918887; doi:10.1136/bmjopen-2020-044500), 2021-02-26
Supplement: bmjopen-2020-044500supp007.pdf [file bmjopen-2020-044500supp007.pdf]

## B. ROC curves for laboratory tests used as input to NN.

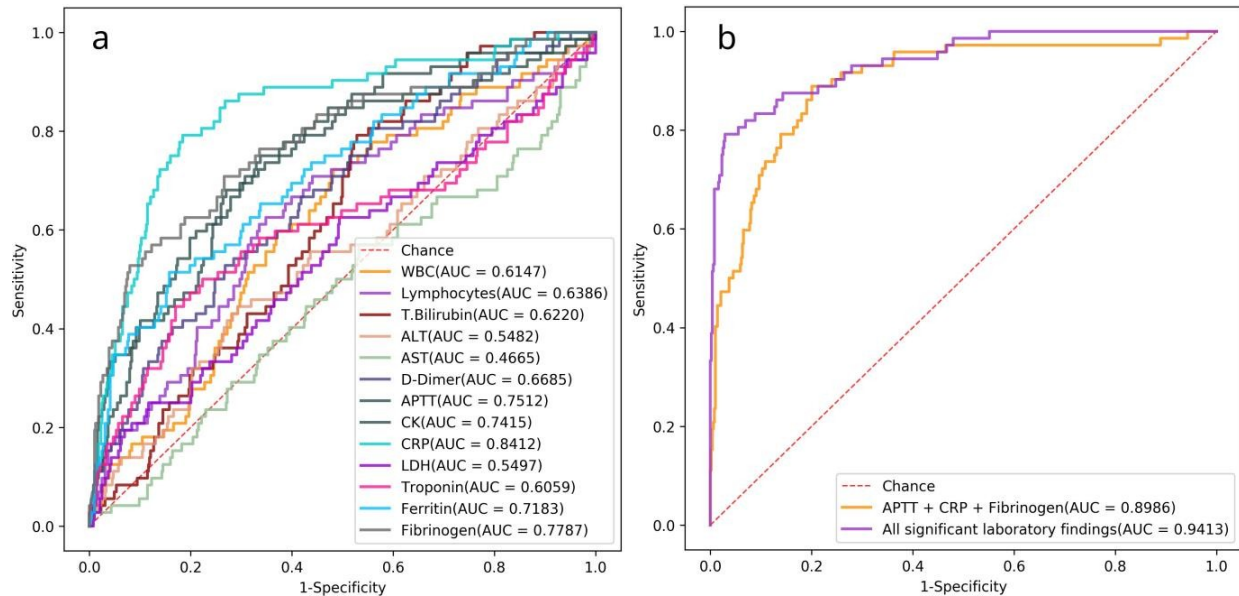

Figure 3: ROC curves for the laboratory tests used as input to NN separately (a) and in the combination (b). The models are trained with 10 folds cross-validation.

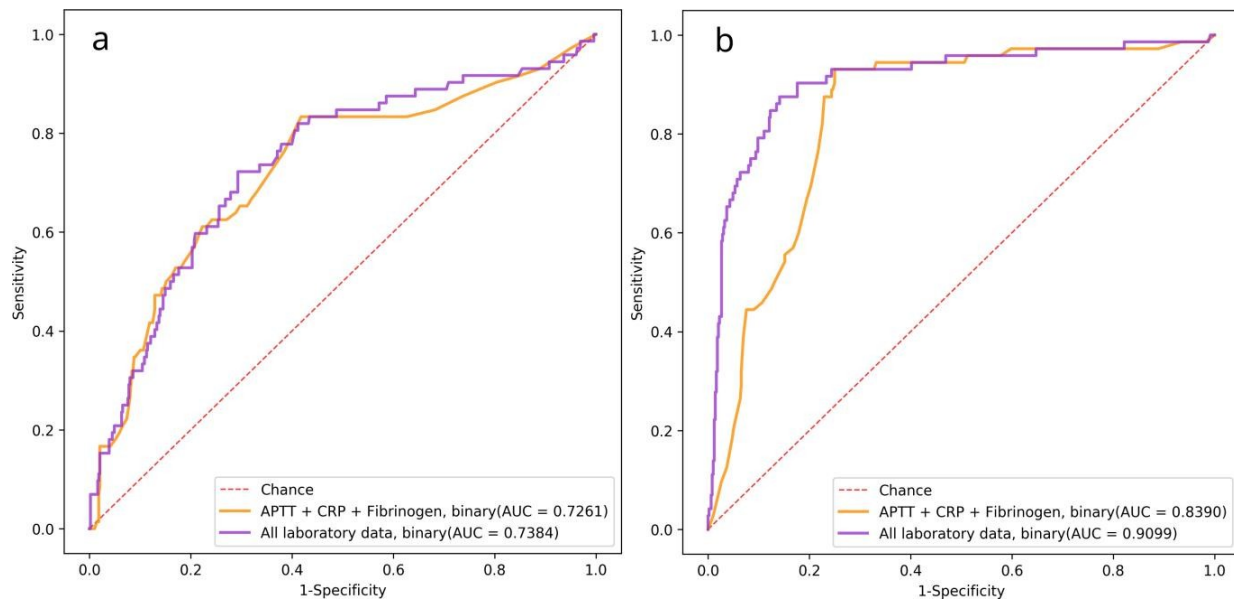

Figure 4: The performance of the 10 folds cross-validation logistic regression model trained on binary data with the threshold moving technique returned by the ML estimator (a), and with the cut-off level set to the 25<sup>th</sup> percentile for lymphocyte count and 75<sup>th</sup> for the other features (b).
