# Supplementary material for: Prediction of COVID-19 severity using laboratory findings on admission: informative values, thresholds, ML model performance
Source: PubMed Central journal article supplement — BMJ Open. 2021 Feb 26;11(2):e044500. doi: 10.1136/bmjopen-2020-044500 (PMC7918887; doi:10.1136/bmjopen-2020-044500), 2021-02-26
Supplement: bmjopen-2020-044500supp009.pdf [file bmjopen-2020-044500supp009.pdf]

# Appendix

## A. ML classification models and feature selection.

### The variables used to build up the model:

- *physical examination on admission*: temperature, HR BPM, SBP, DBP, RR /min. SpO<sub>2</sub>, SpO<sub>2</sub> on RA vs. O<sub>2</sub> Therapy, GCS, SOFA score
- *symptoms on admission*: cough, sputum, sore throat, chest pain, SOB, fever, headache, confusion, having any gastrointestinal symptoms (e.g., nausea, vomiting, diarrhea), myalgia, malaise, loss of smell or taste.
- *laboratory findings on admission*: the count of WBC, platelet, and lymphocyte; the concentration of hemoglobin, total bilirubin, D-Dimer, creatinine, sodium, C-reactive protein, troponin, ferritin, fibrinogen; the activity of ALT, AST, CK, LDH; APTT.

### Feature selection:

To check if there are unique patterns within the data that can unambiguously identify if the patient is going to be transferred to the intensive care unit, we utilized ML algorithms.

To assess the importance of the features fed to the ML models as predictors of admitted to ICU patients, we employed four ensemble tree-based estimators such as AdaBoost, Gradient Boosting, Random Forest, and Extra Trees. These models were trained on the whole dataset and used to rank the features in ascending order concerning their predictive potential. Figure 1 and Table 1 display the averaged values of impurity-based attribute ranks, where the average for each feature is calculated as the mean of rank values for the four ML methods mentioned above.

Table 1: Ranking scores of the variables selected for predicting the disease severity

| Score   | Feature           | Score   | Feature                  | Score   | Feature         | Score   | Feature          |
|---------|-------------------|---------|--------------------------|---------|-----------------|---------|------------------|
| 0.19429 | SOFA score        | 0.02520 | Temperature              | 0.01164 | Total bilirubin | 0.00466 | Sore Throat      |
| 0.10168 | Clinical severity | 0.01748 | SOB                      | 0.01135 | SBP             | 0.00445 | Troponin         |
| 0.08745 | O2 therapy        | 0.01712 | ALT                      | 0.00983 | Fever           | 0.00367 | Confusion        |
| 0.08061 | RR/min            | 0.01623 | APTT                     | 0.00969 | GCS             | 0.00309 | GI symptoms      |
| 0.04127 | LDH               | 0.01595 | Hemoglobin               | 0.00896 | Ethnicity       | 0.00287 | Cough            |
| 0.03829 | Lymphocytes       | 0.01545 | SpO2 on RA vs O2 Therapy | 0.00732 | HR BPM          | 0.00188 | Malaise          |
| 0.03223 | SpO2              | 0.01505 | Na                       | 0.00637 | Myalgia         | 0.00186 | Chest pain       |
| 0.03212 | D-Dimer           | 0.01383 | AST                      | 0.00633 | Sputum          | 0.00141 | Smell/taste loss |
| 0.03125 | CRP               | 0.01382 | CK                       | 0.00524 | DBP             | 0.00000 | Creatinine       |
| 0.03067 | Platelet          | 0.01360 | WBC                      | 0.00513 | Headache        | 0.00000 | Ferritin         |
|         |                   |         |                          |         |                 | 0.00000 | Fibrinogen       |

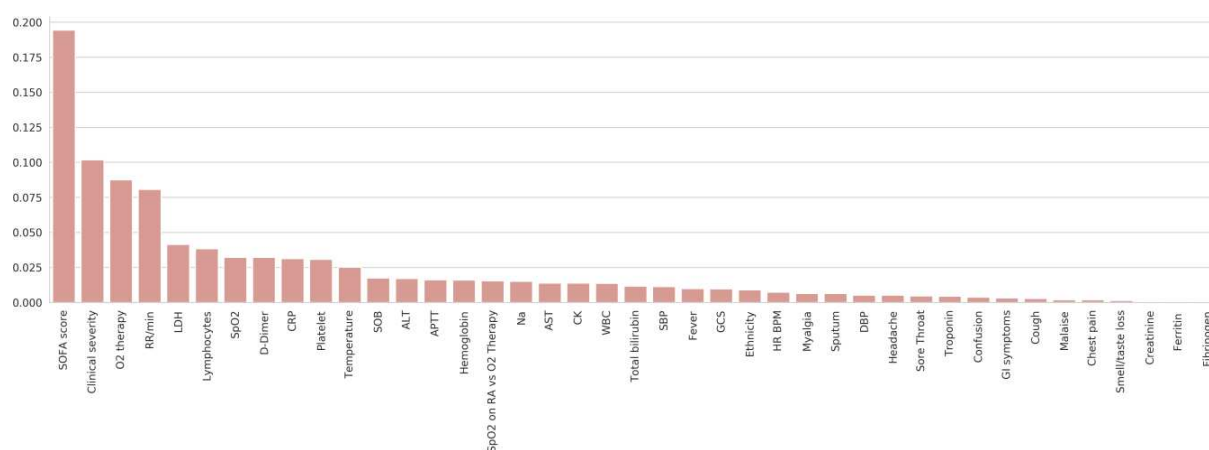

Figure 1: Feature selection for predicting whether a patient is going to be transferred to ICU

Table 2: Specificity and sensitivity of the ML model applied to the all features as predictors of the severity of the disease

| ML model                         | Specificity | Sensitivity |
|----------------------------------|-------------|-------------|
| Gradient Boosting                | 0.5972      | 0.9734      |
| AdaBoost                         | 0.6667      | 0.9775      |
| Extra Trees                      | 0.7361      | 0.9693      |
| Random Forest                    | 0.75        | 0.9795      |
| NN                               | 0.9938      | 1.0         |
| SVM linear                       | 0.6806      | 0.9508      |
| Logistic regression              | 0.6667      | 0.952       |
| Logistic regression (L1 penalty) | 0.7083      | 0.959       |

Table 3: Confusion matrix to assess the accuracy of classification with a three-layer dense NN model to predict the severity of the disease

|        |                     | Predicted           |                 |
|--------|---------------------|---------------------|-----------------|
|        |                     | Not admitted to ICU | Admitted to ICU |
| Actual | Not admitted to ICU | 485                 | 3               |
|        | Admitted to ICU     | 0                   | 72              |

**Prediction of transferring to ICU.** We utilized three-layer fully connected NN with the following configuration of hidden layers (35, 30, 10) and with the stochastic gradient descent optimizer. The learning rate hyperparameter of the model was assigned to 0.1. The model was also regularized using L2 penalty with 0.0001 alpha value. NN was trained for maximum 100 epochs or before converged. Convergence implies that the loss function is not improving by at least 0.0001 for 10 consecutive iterations.

To evaluate the classifier output quality, we trained several ML classification models using a stratified 10-fold cross-validation technique to generalize the models to the true rate error. For each fold, we used 90% of the data to train the model and then tested it on the rest 10%.

The decision matrices built on the test dataset for all folds were combined and used to calculate the performance metrics. The best performance measures were obtained with a three-layer fully connected NN.

Table 4: Classification metrics of the NN model to predict the event of being transferred to ICU

|                     | Recall | Precision | F1 score | Support |
|---------------------|--------|-----------|----------|---------|
| Not admitted to ICU | 1.00   | 0.99      | 1.00     | 488     |
| Admitted to ICU     | 0.96   | 1.00      | 0.98     | 72      |
| accuracy            |        |           | 0.99     | 560     |
| macro average       | 0.98   | 1.00      | 0.99     | 560     |
| weighted average    | 0.99   | 0.99      | 0.99     | 560     |

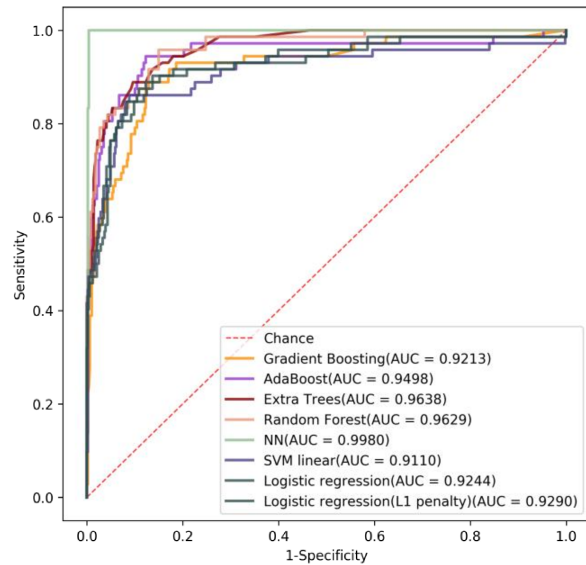

Figure 2: The performance of the employed NN classification method.

## B. ROC curves for laboratory tests used as input to NN.

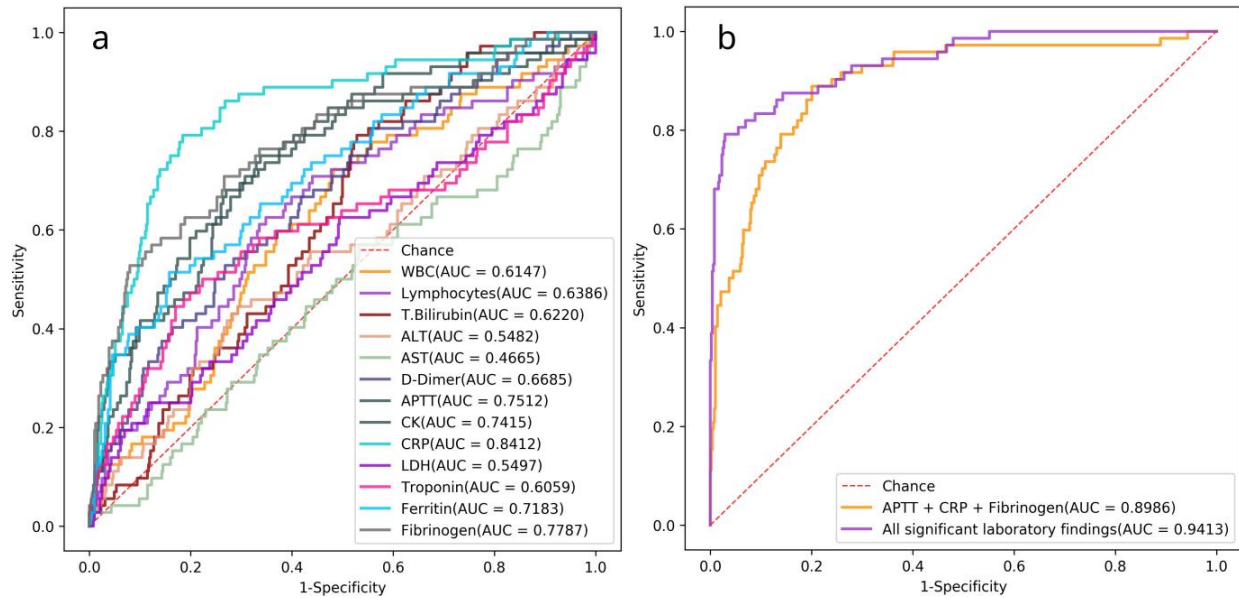

Figure 3: ROC curves for the laboratory tests used as input to NN separately (a) and in the combination (b). The models are trained with 10 folds cross-validation.

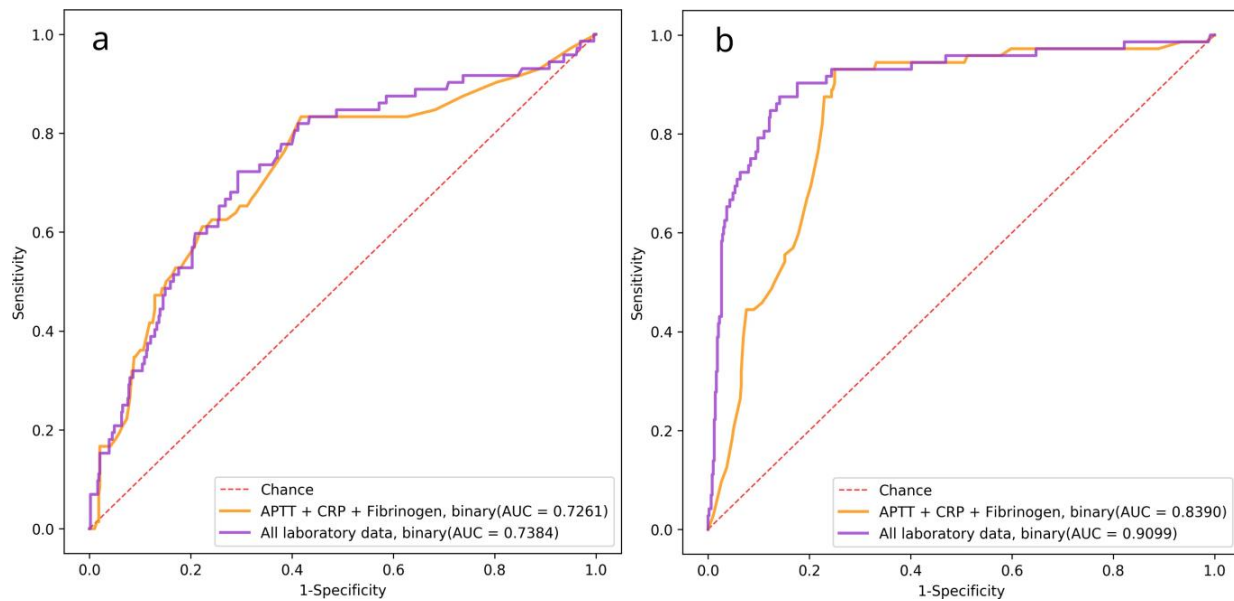

Figure 4: The performance of the 10 folds cross-validation logistic regression model trained on binary data with the threshold moving technique returned by the ML estimator (a), and with the cut-off level set to the 25<sup>th</sup> percentile for lymphocyte count and 75<sup>th</sup> for the other features (b).
